# Supplementary material for: A Catalogue of Structural Variation across Ancestrally Diverse Asian Genomes
Source: PubMed Central journal article supplement (PMC11535549; doi:10.1038/s41467-024-53620-8), 2024-11-04
Supplement: 41467_2024_53620_MOESM3_ESM.pdf [file 41467_2024_53620_MOESM3_ESM.pdf]

## Description of Additional Supplementary Files

File Name: Supplementary Data 1

Description: Demographics of SG10K samples across different ethnic groups

File Name: Supplementary Data 2

Description: Precision and Recall of deletions using different SV calling pipelines using 34 1000G samples with corresponding long read data.

File Name: Supplementary Data 3

Description: Benchmarking duplications in ten 1KG samples using the SG10K-SV workflow

File Name: Supplementary Data 4

Description: Sensitivity and Precision of our pipeline measured using ten 1000Genome project samples

File Name: Supplementary Data 5

Description: Hotspot location detected using the SG10K-SV variants.

File Name: Supplementary Data 6

Description: Distribution of SVs disrupting regulatory regions (ENCODE cCREs) across allele frequency bins.

File Name: Supplementary Data 7

Description: Distribution of SVs disrupting gene centric features across allele frequency bins.

File Name: Supplementary Data 8

Description: Selected 86 events which shows significant  $F_{st}$  between ethnic groups.

File Name: Supplementary Data 9

Description: Linkage Disequilibrium  $R^2$  between SV and lead GWAS SNP obtain from the GWAS Catalog. The P-values were obtained from each individual study.
